# Supplementary material for: Patent landscape of neglected tropical diseases: an analysis of worldwide patent families
Source: PubMed Central journal article supplement (PMC5686799; doi:10.1186/s12992-017-0306-9), 2017-11-14
Supplement: 12992_2017_306_MOESM2_ESM.pdf [file 12992_2017_306_MOESM2_ESM.pdf]

# Buruli ulcer

A

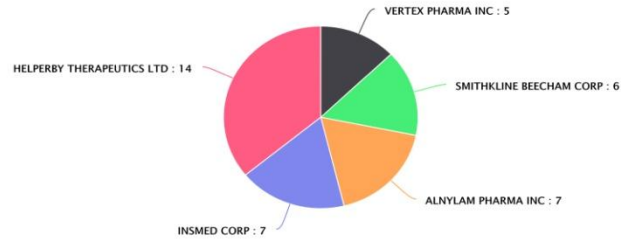

B

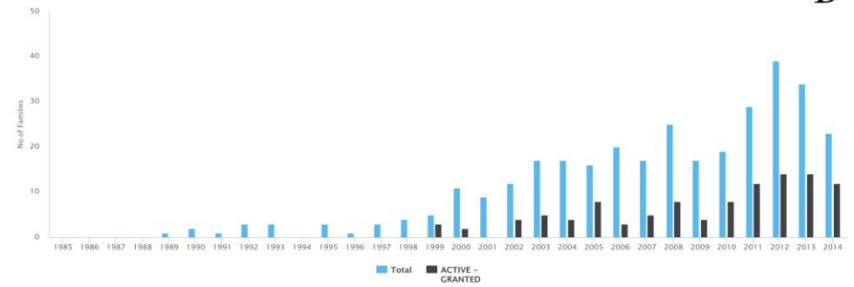

C

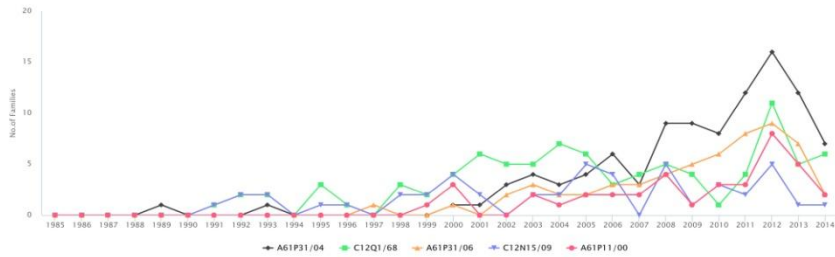

D

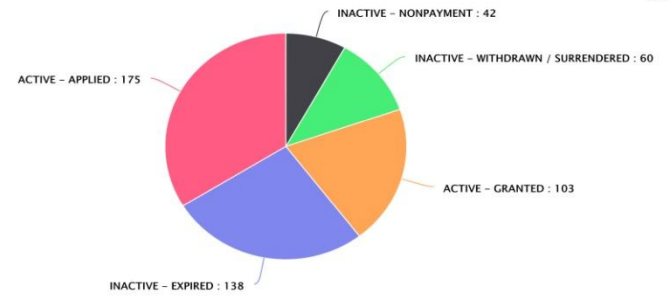

E

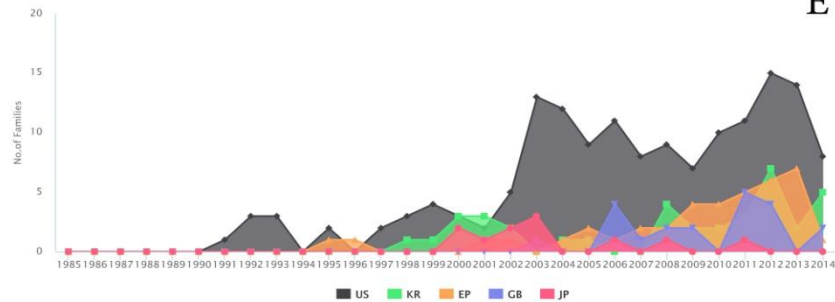

F

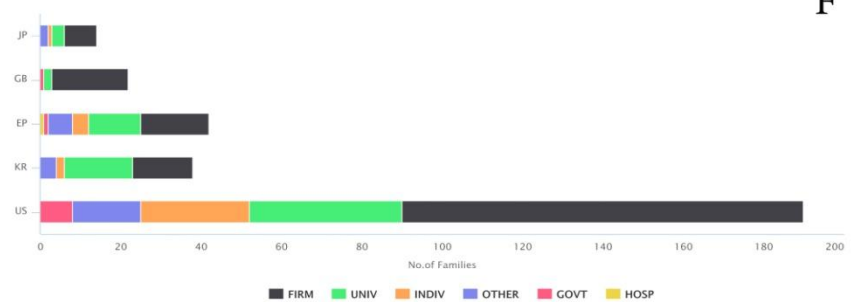

# Chagas disease

A

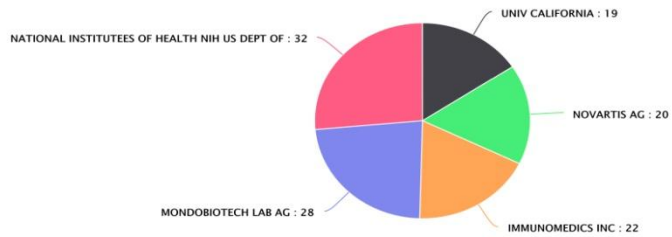

B

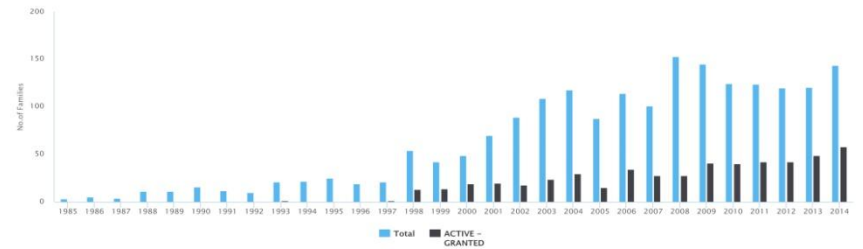

C

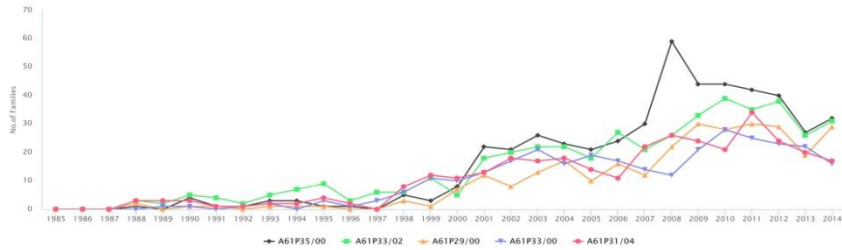

D

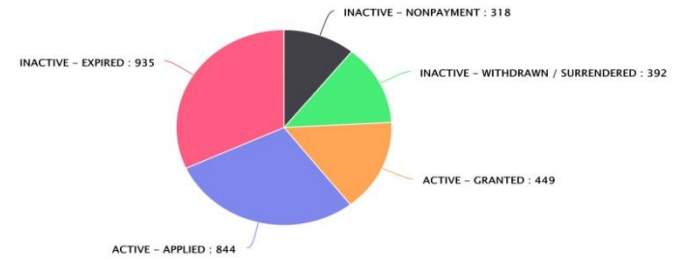

E

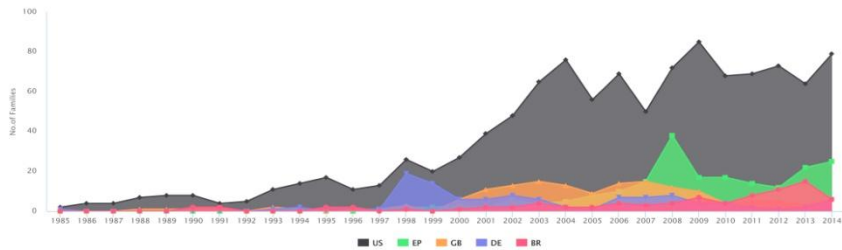

F

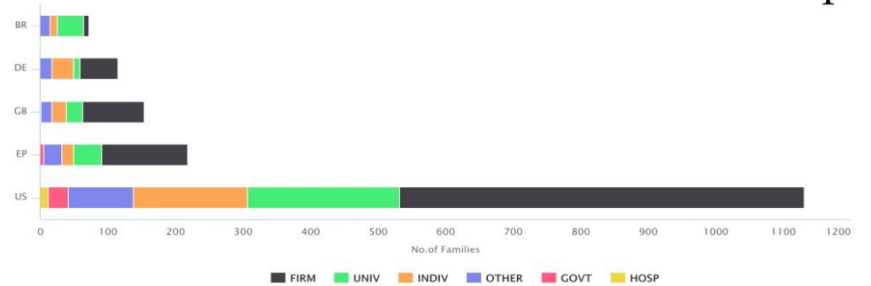

# Dengue

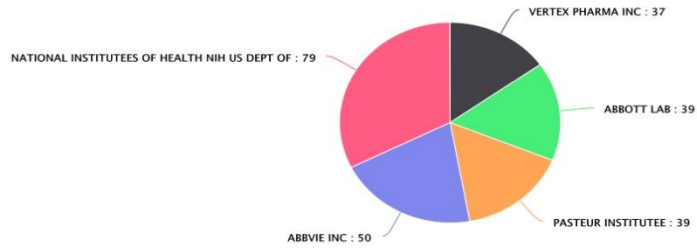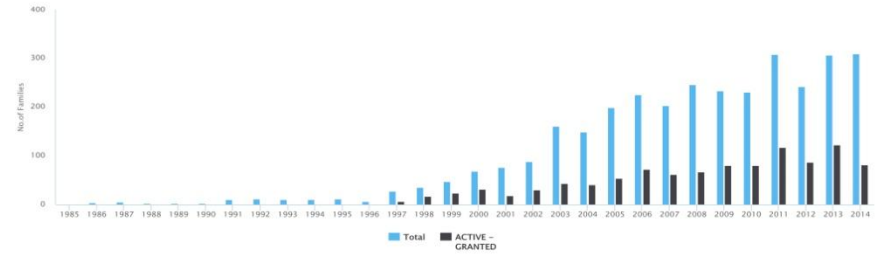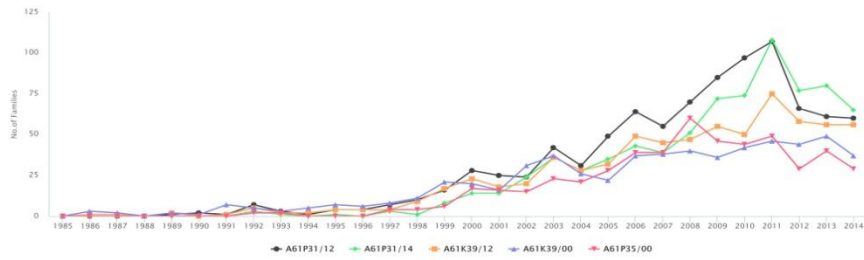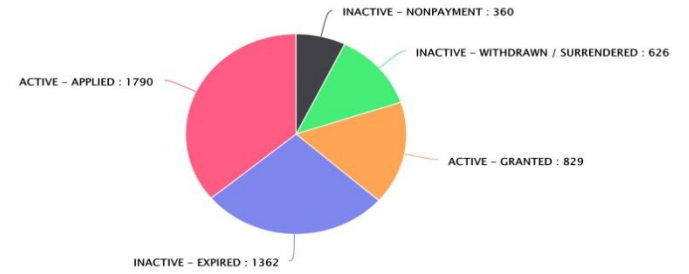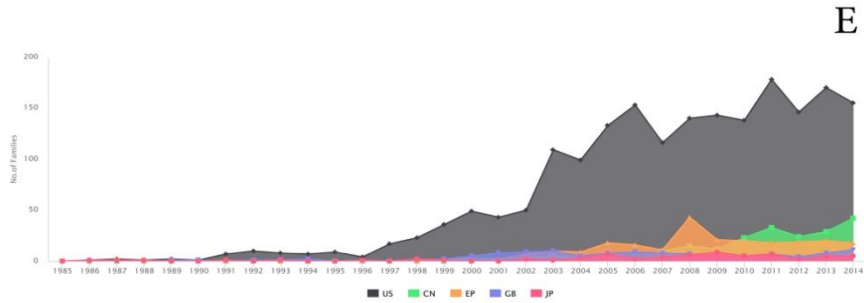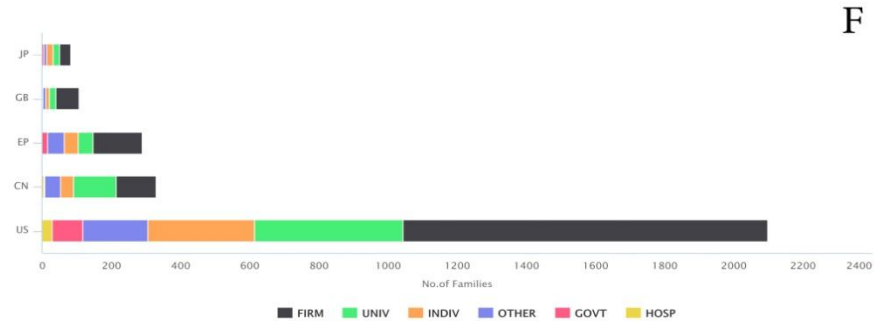

# Dracunculiasis

A

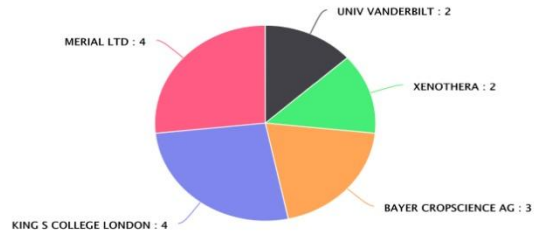

B

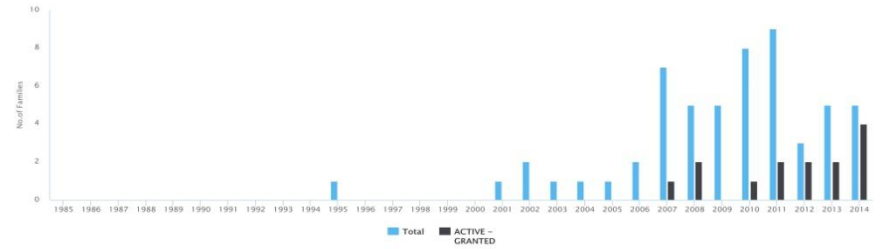

C

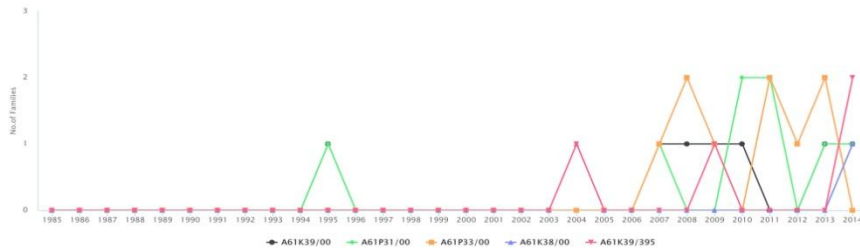

D

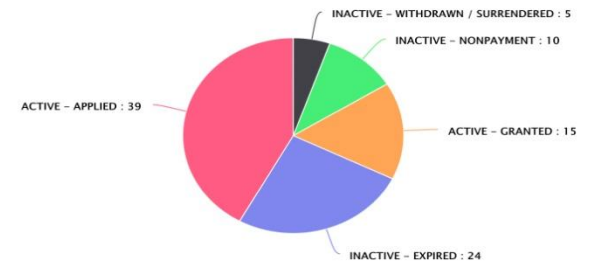

E

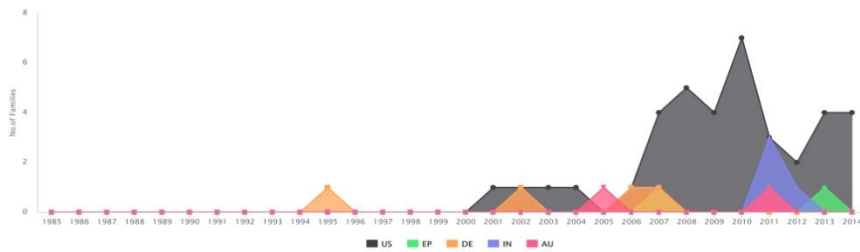

F

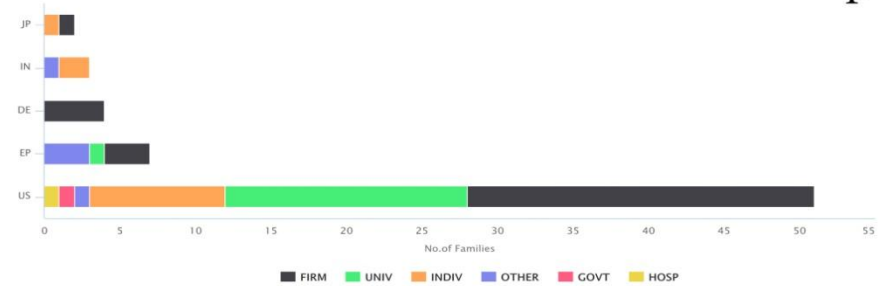

# Echinococcosis

A

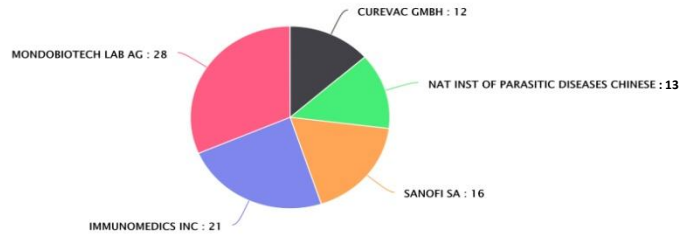

B

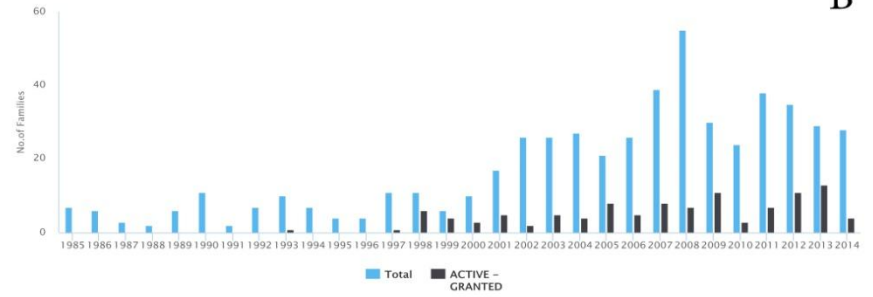

C

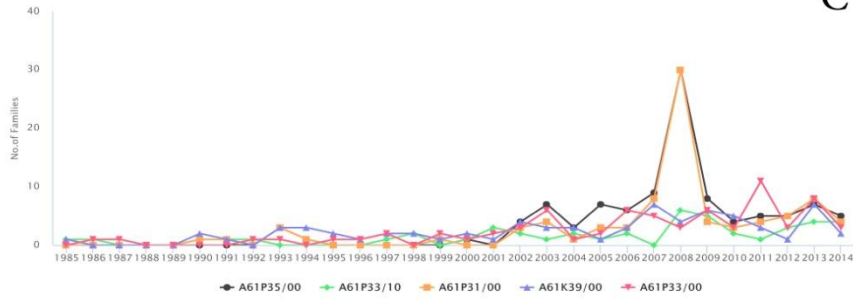

D

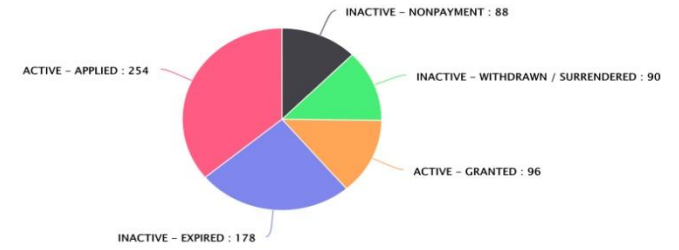

E

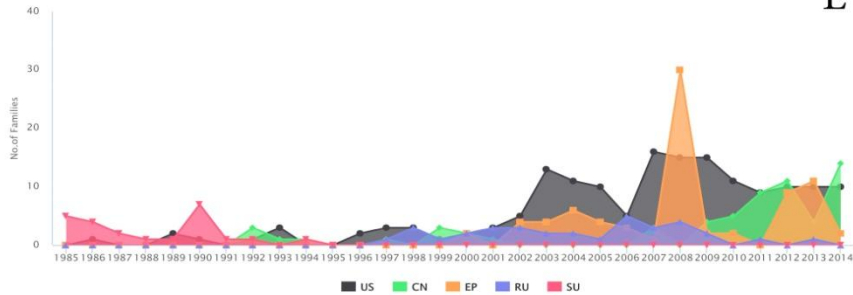

F

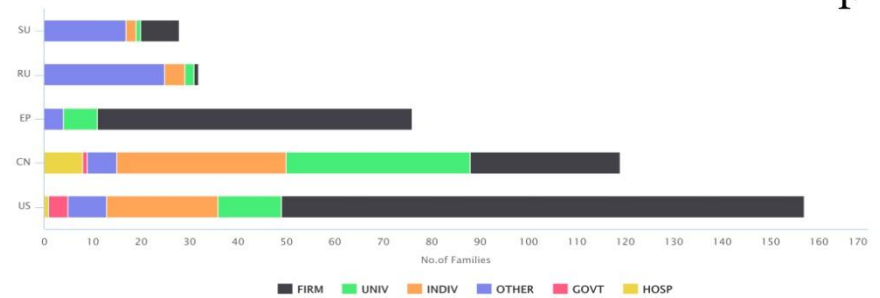

# Food-borne trematodiasis

A

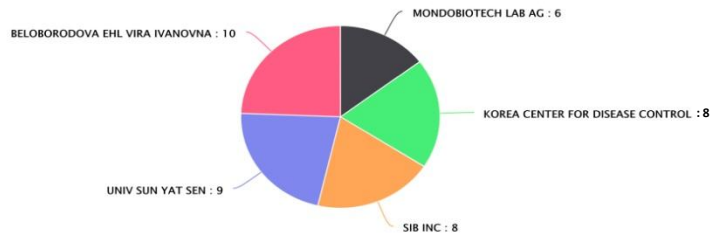

B

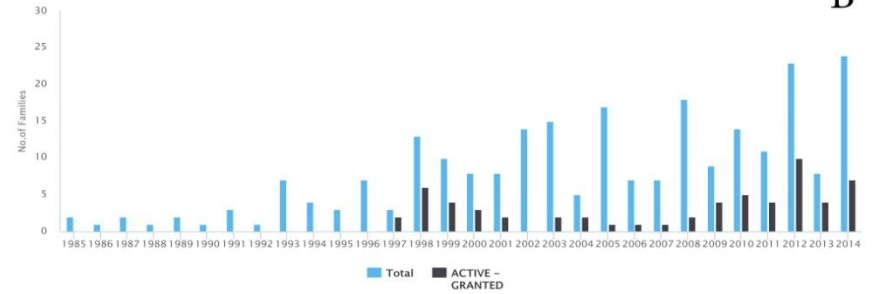

C

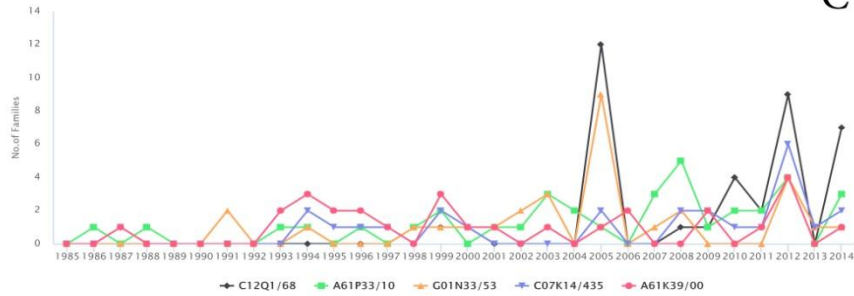

D

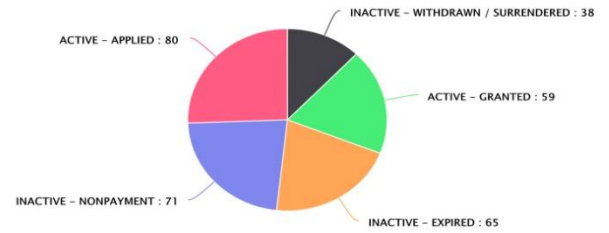

E

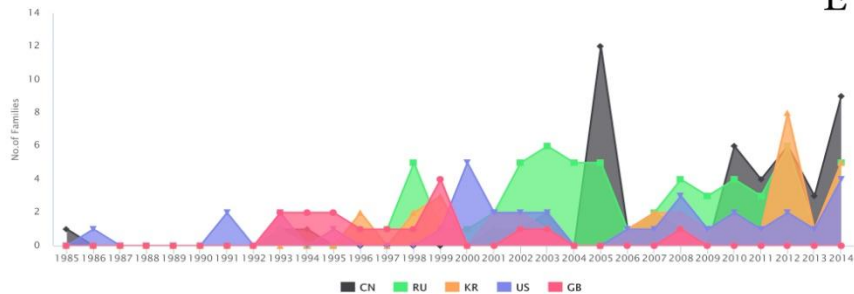

F

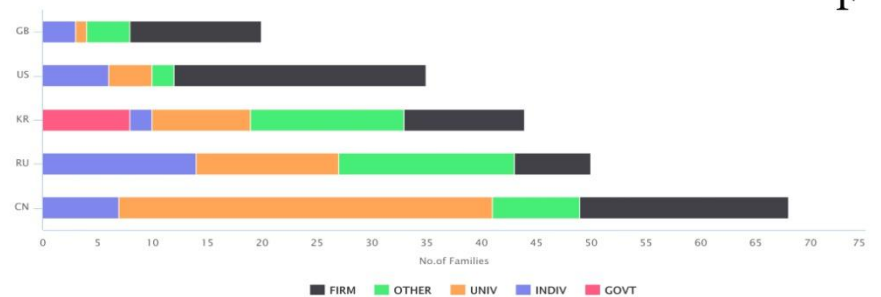

# Human African trypanosomiasis

A

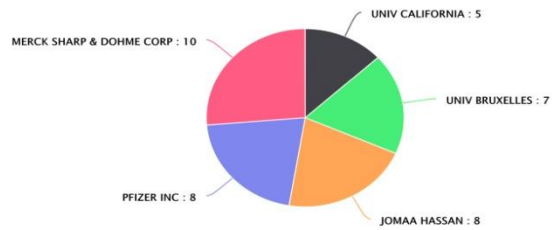

B

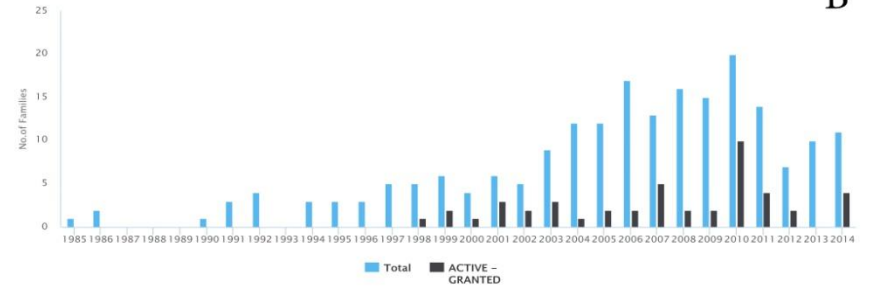

C

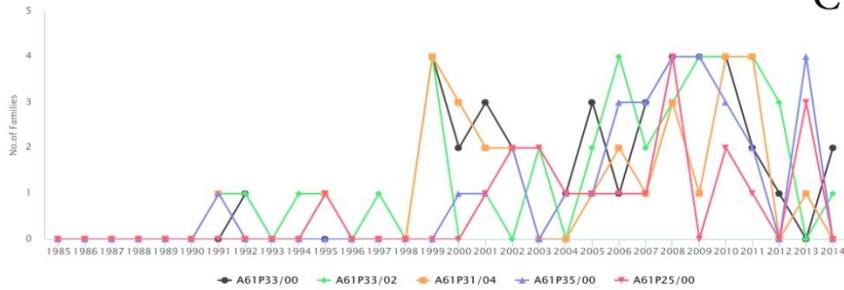

D

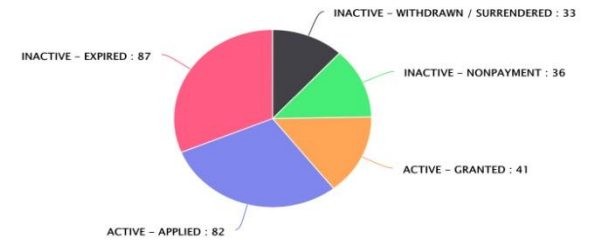

E

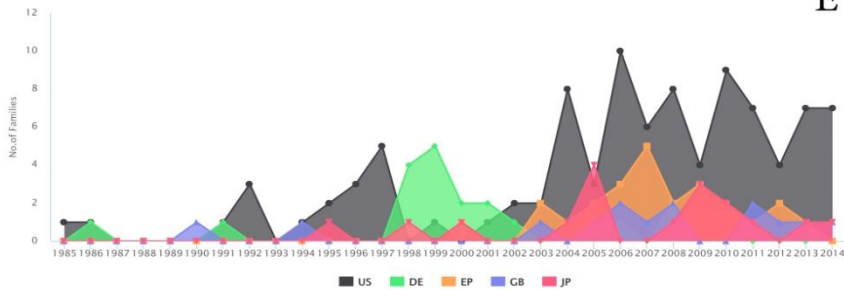

F

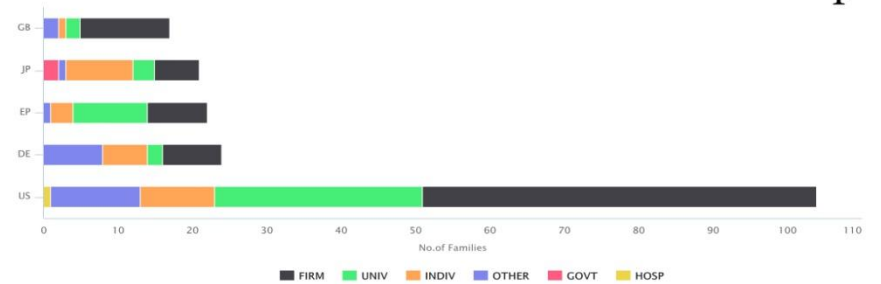

# Leishmaniasis

A

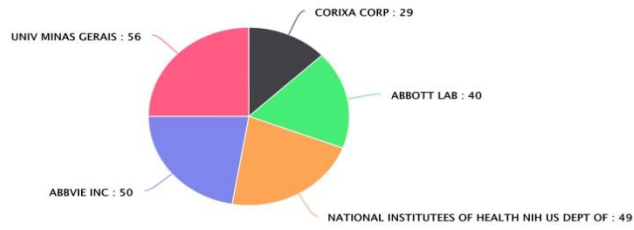

B

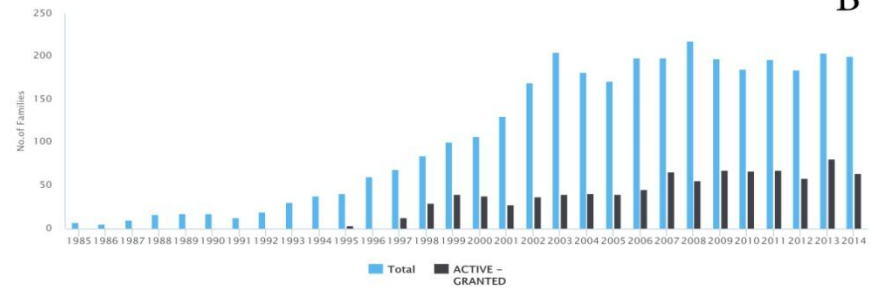

C

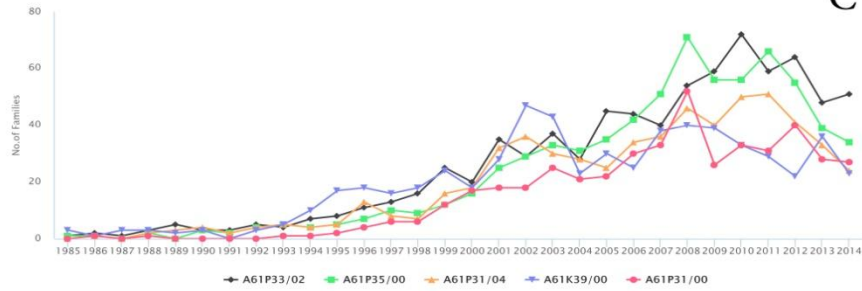

D

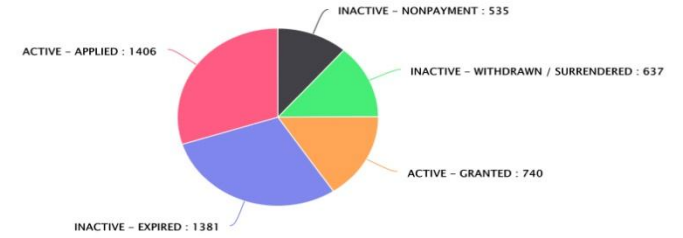

E

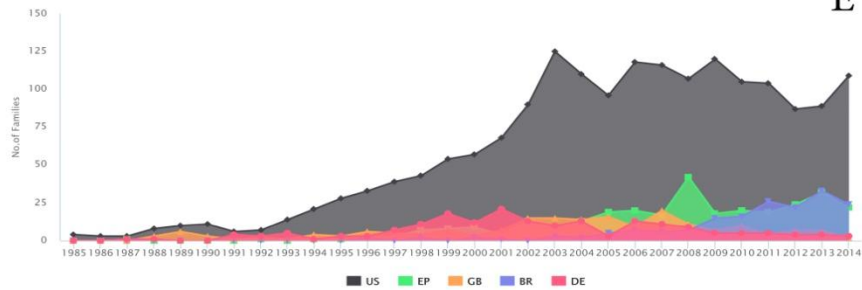

F

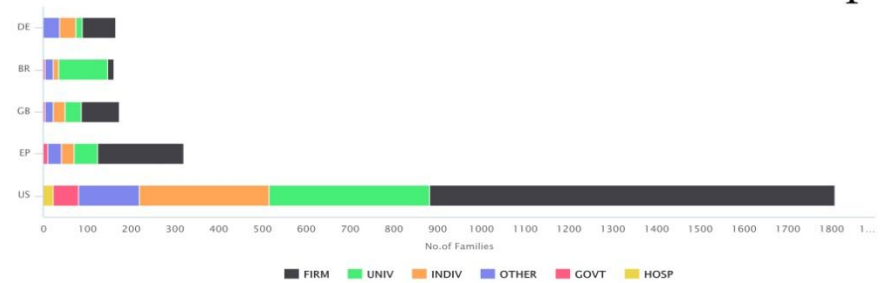



# Leprosy

A

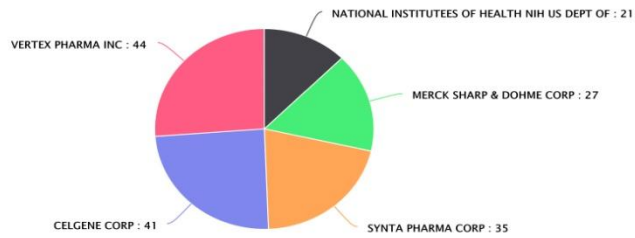

B

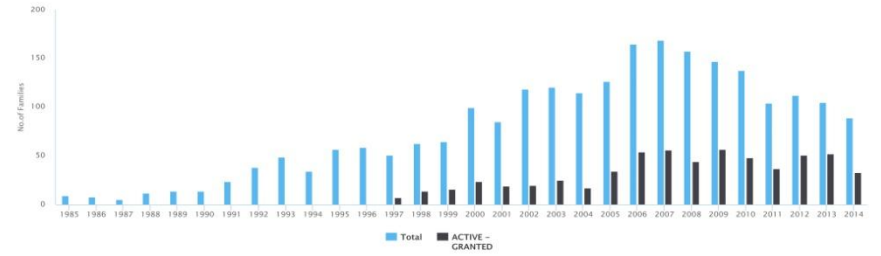

C

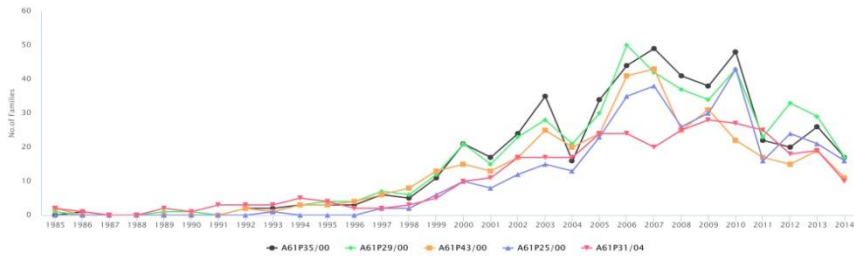

D

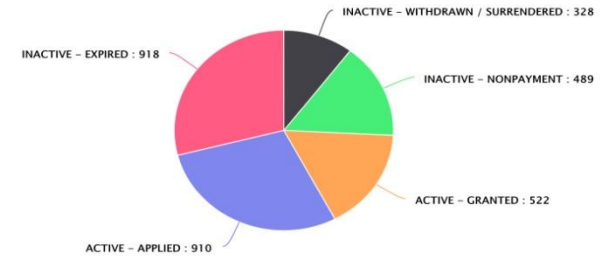

E

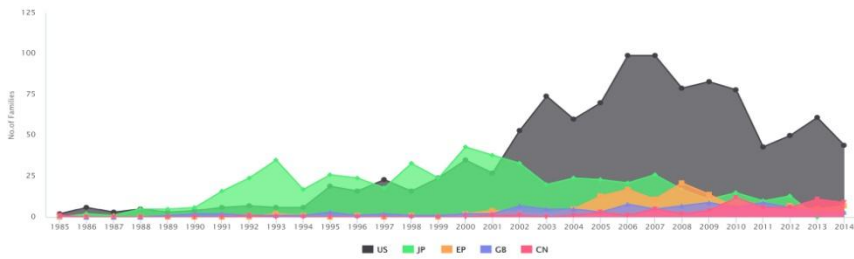

F

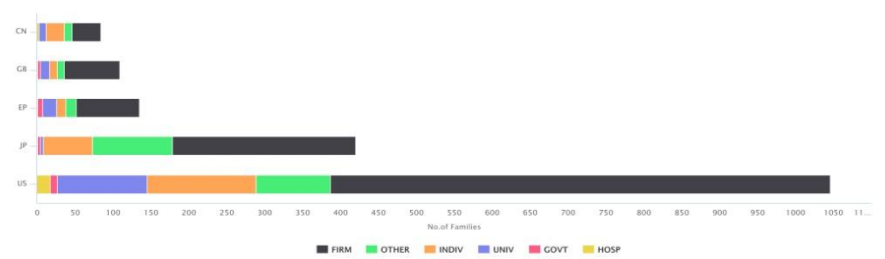

# Lymphatic filariasis

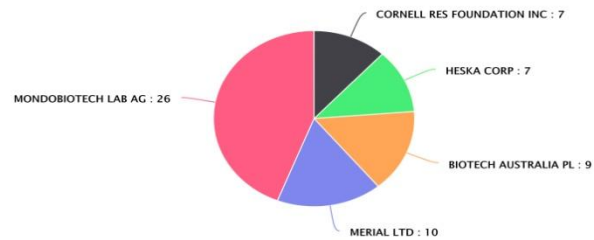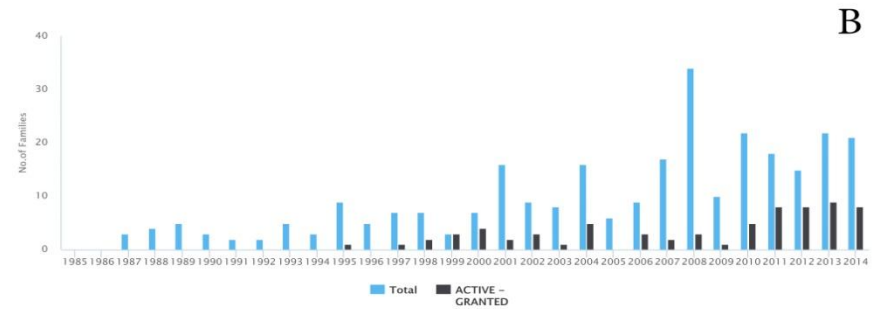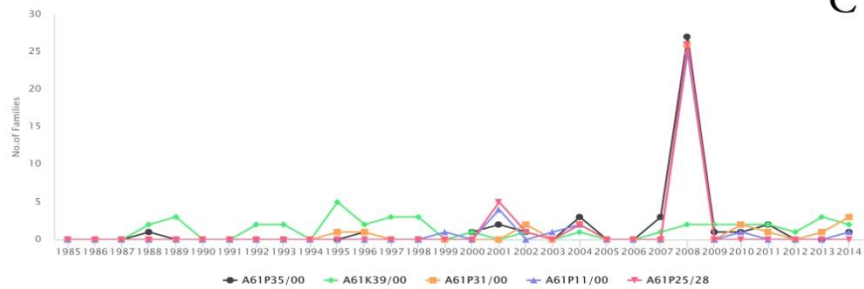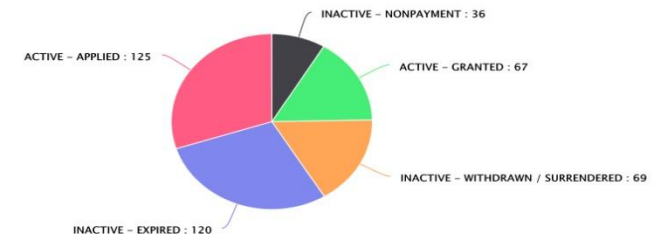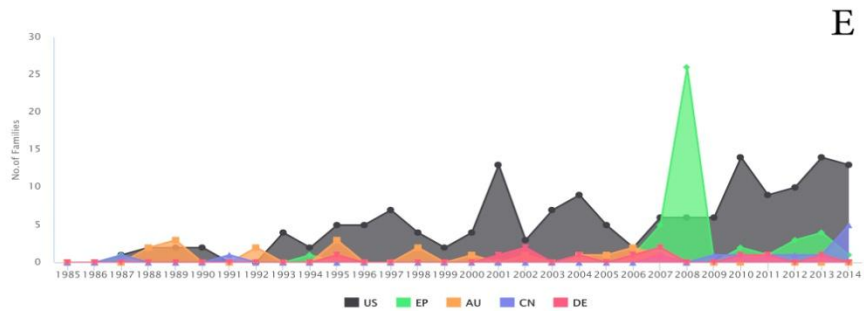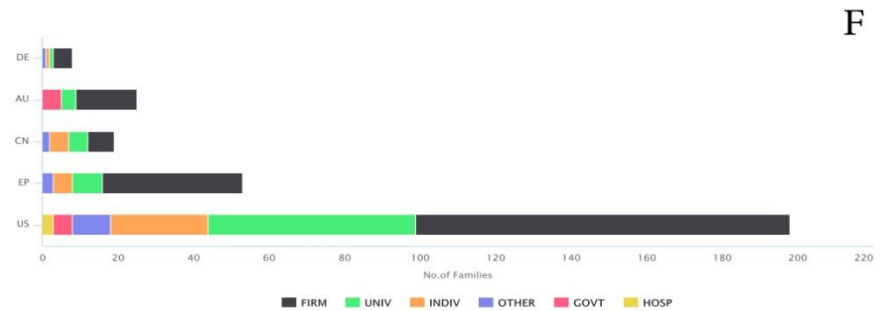

# Onchocerciasis

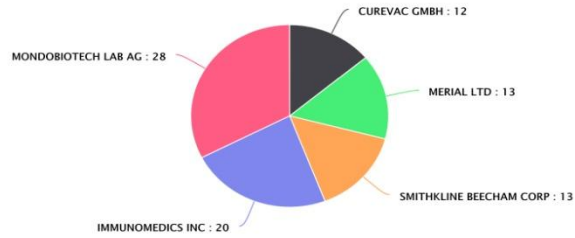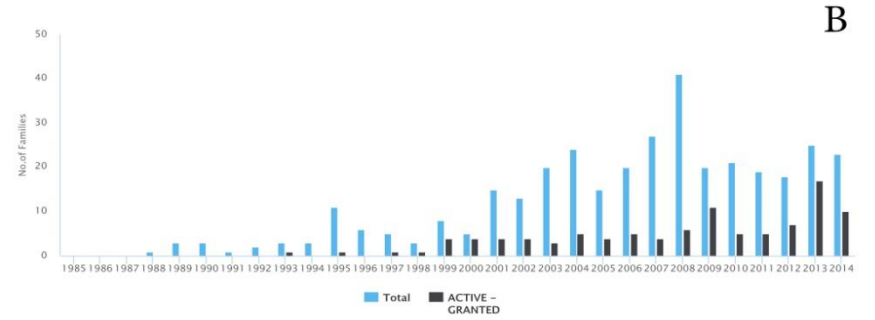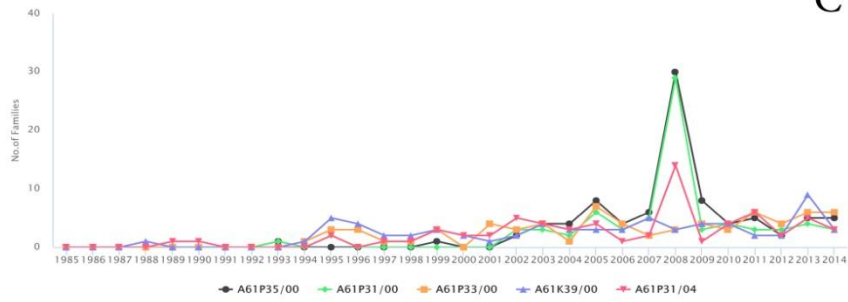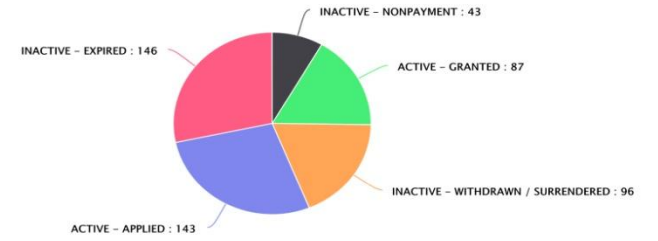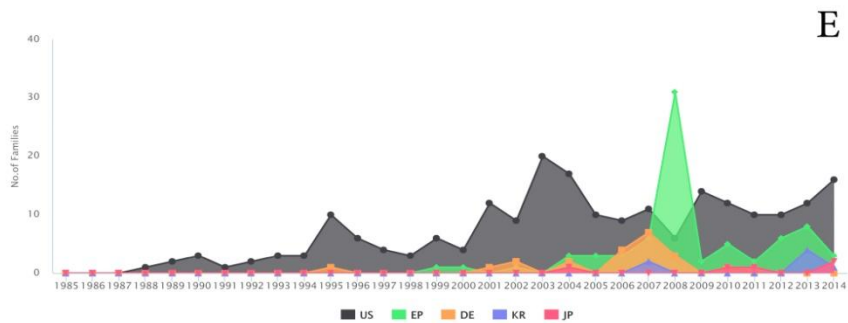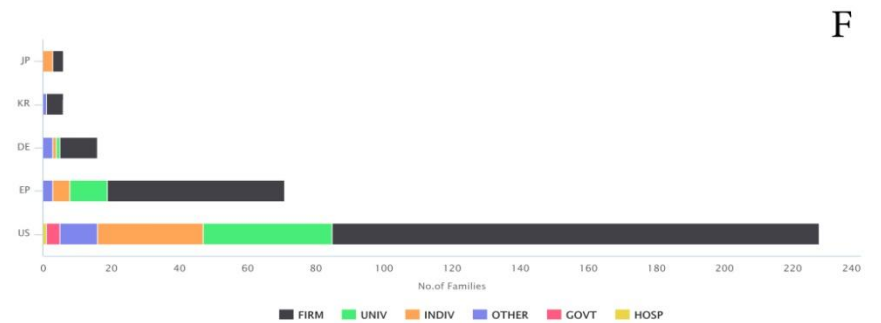

# Rabies

A

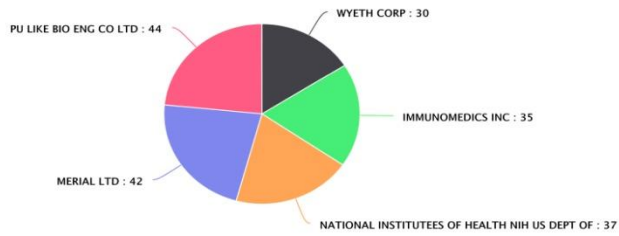

B

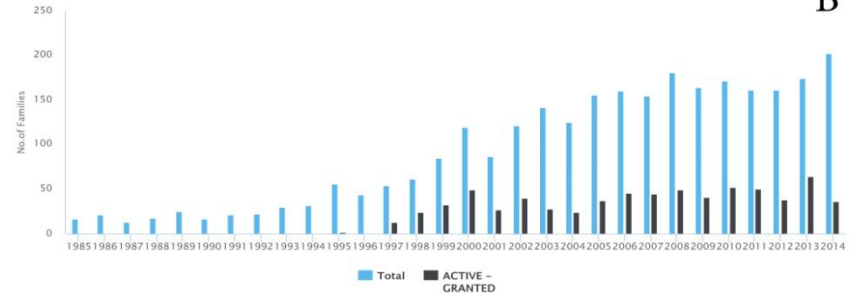

C

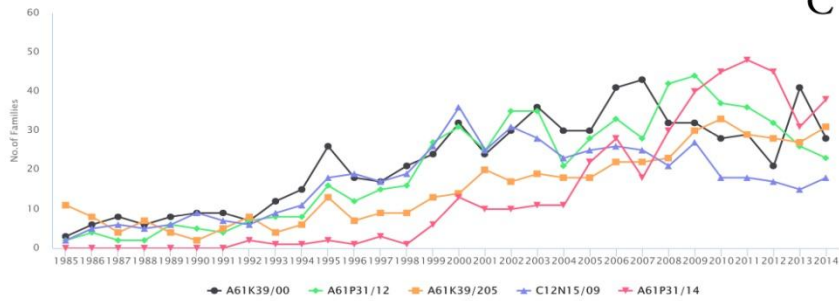

D

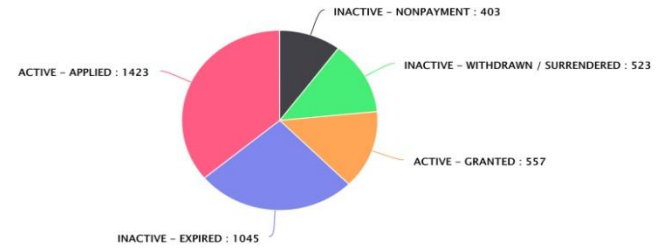

E

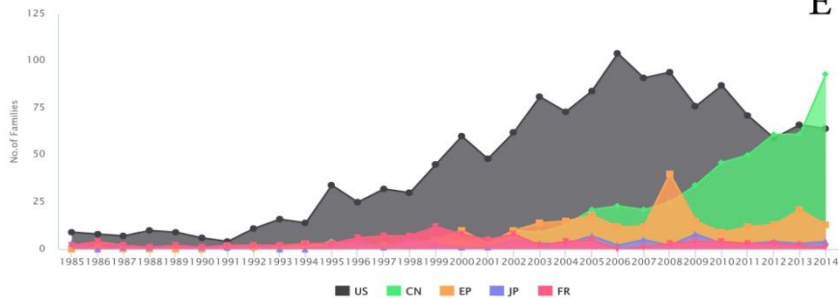

F

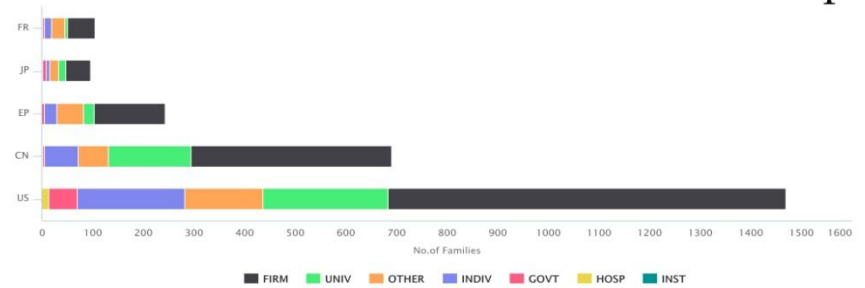

# Schistosomiasis

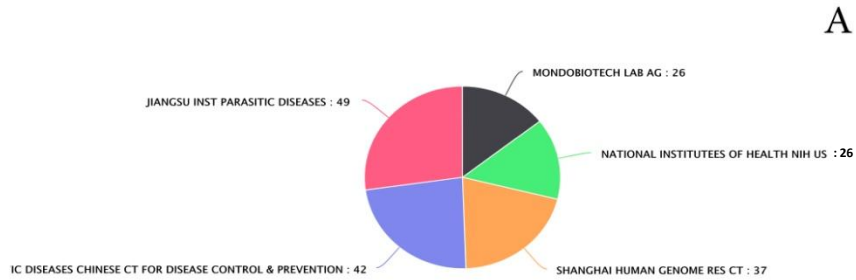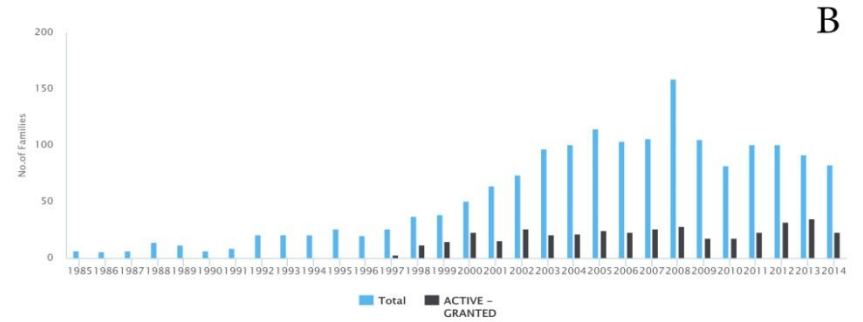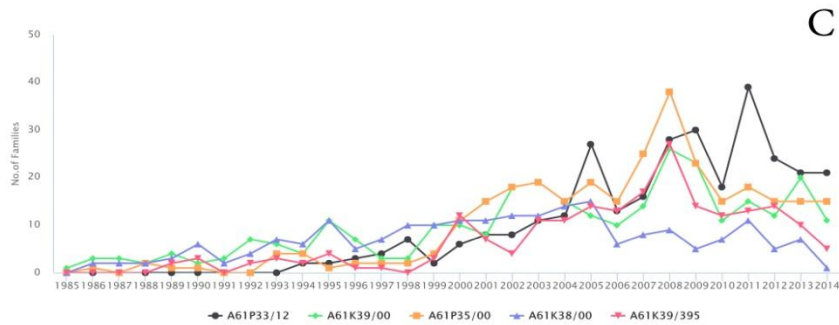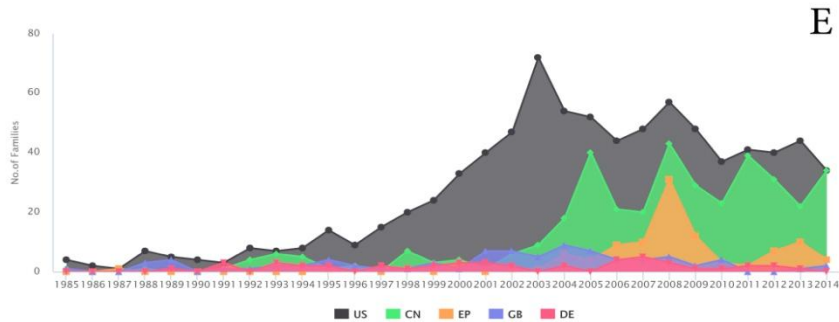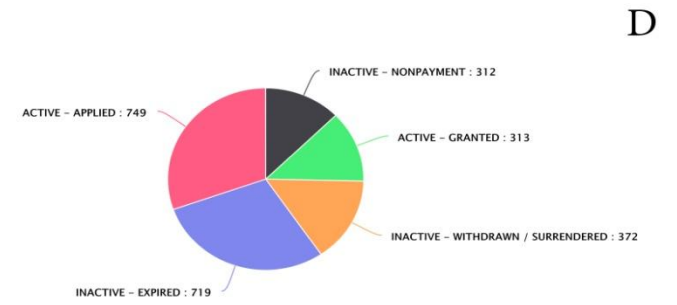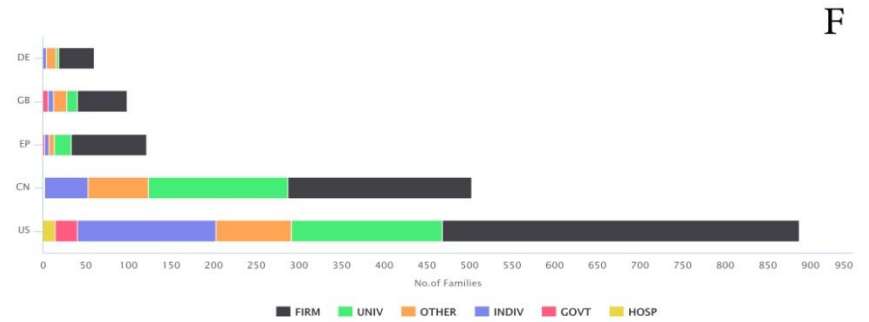

# Soil-transmitted helminth infections

A

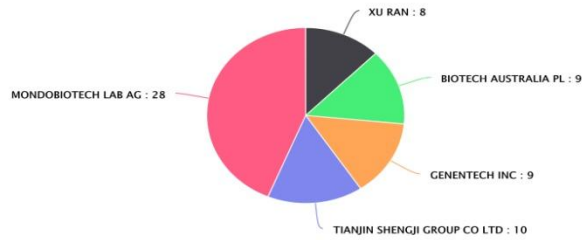

B

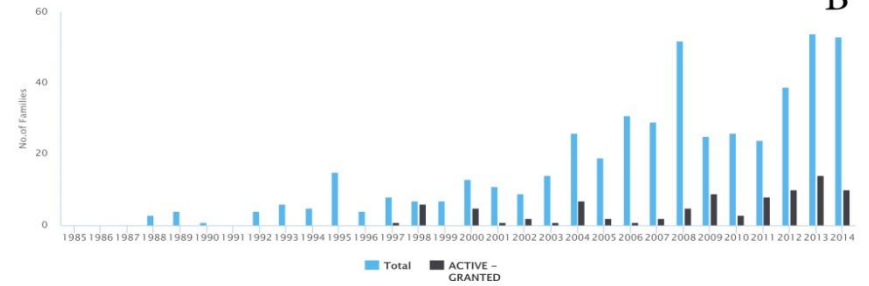

C

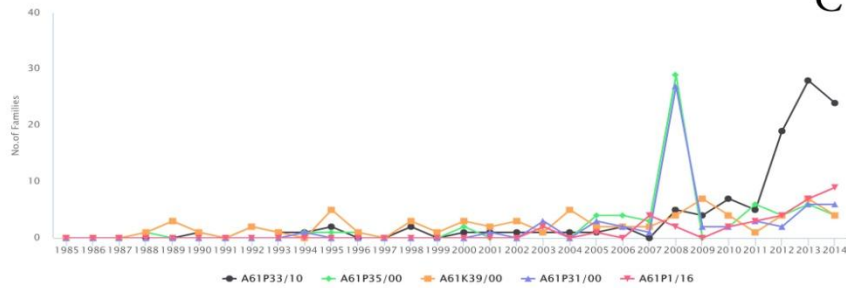

D

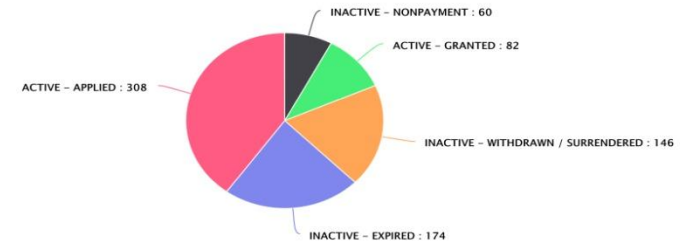

E

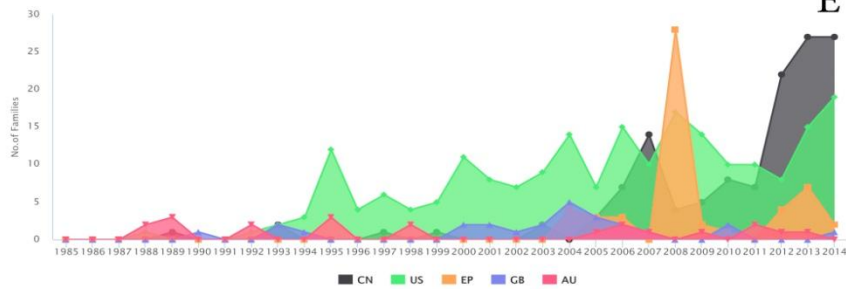

F

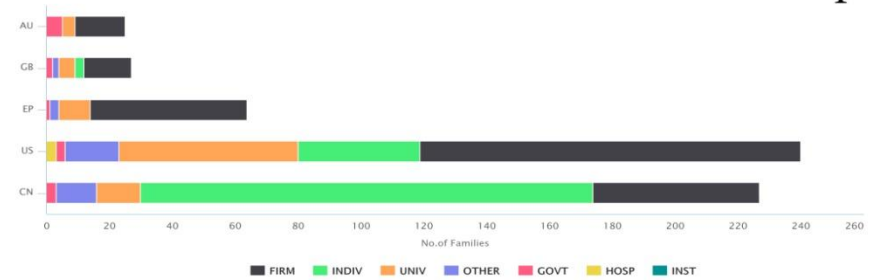

# Taeniasis

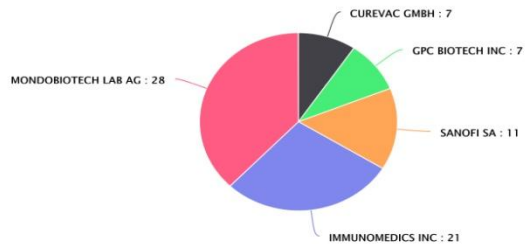

A

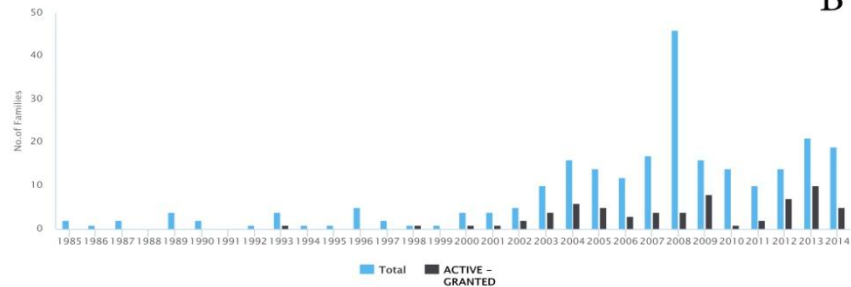

B

C

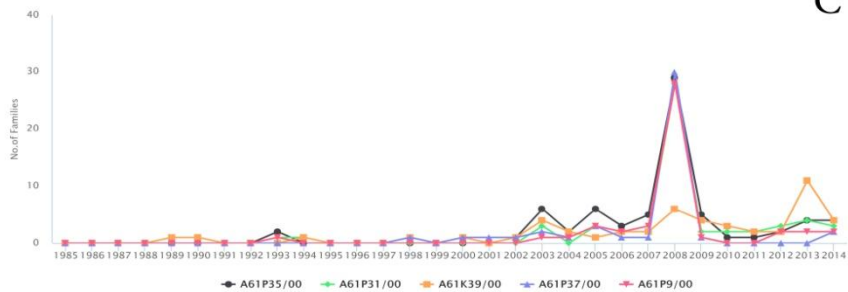

D

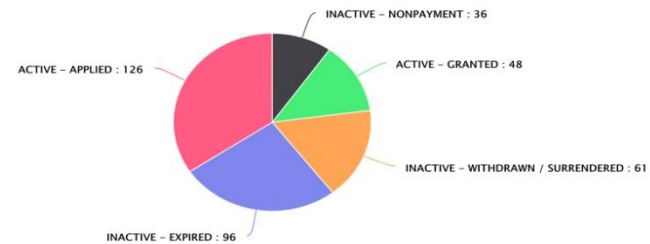

E

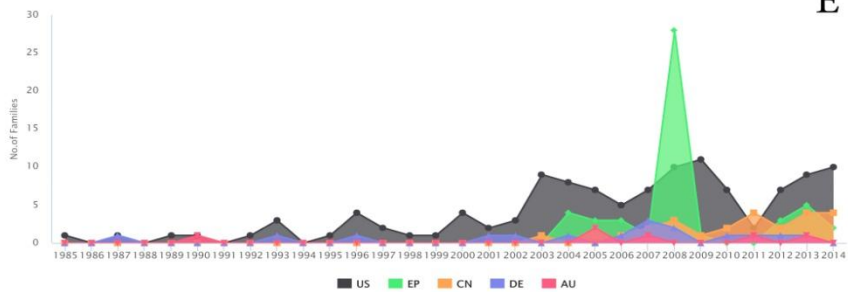

F

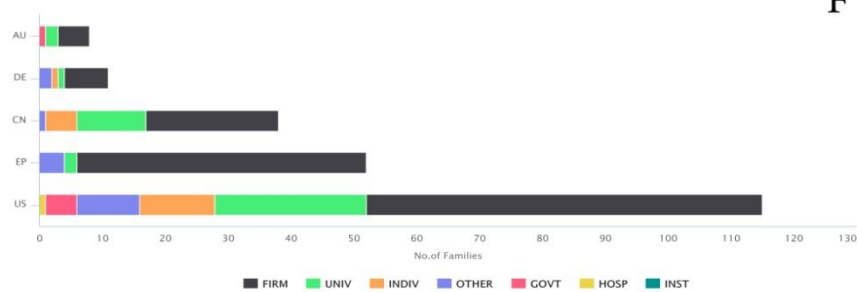

# Trachoma

A

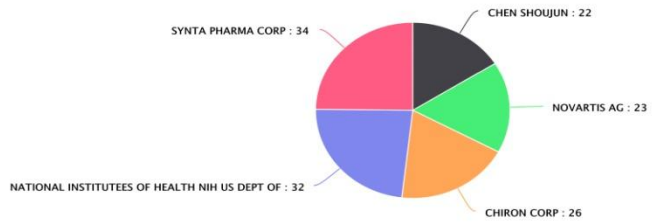

B

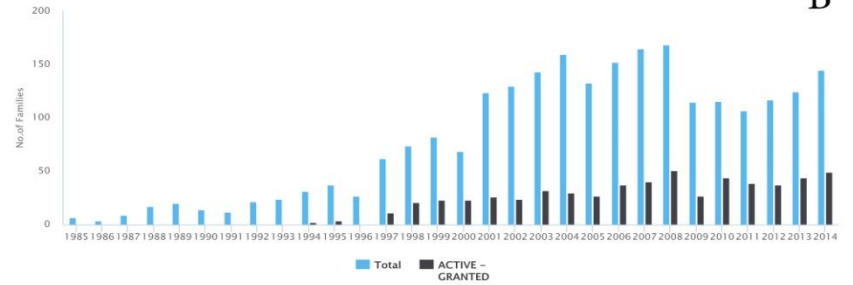

C

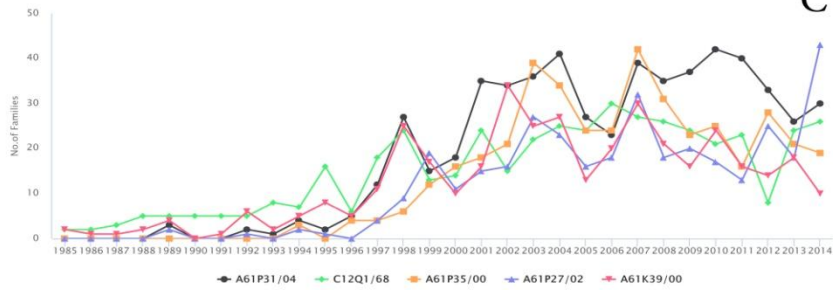

D

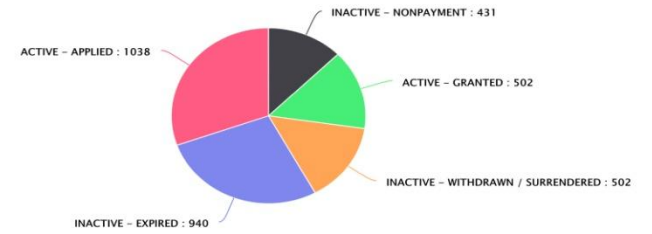

E

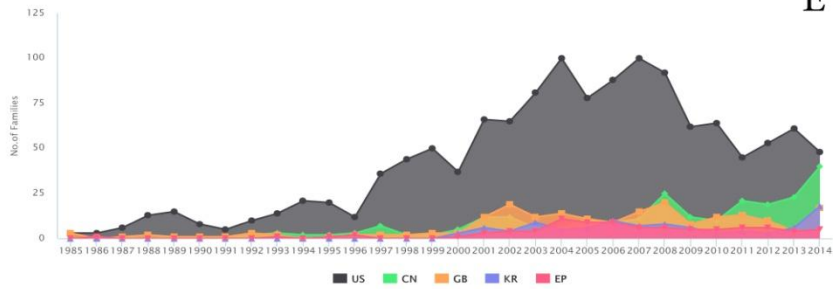

F

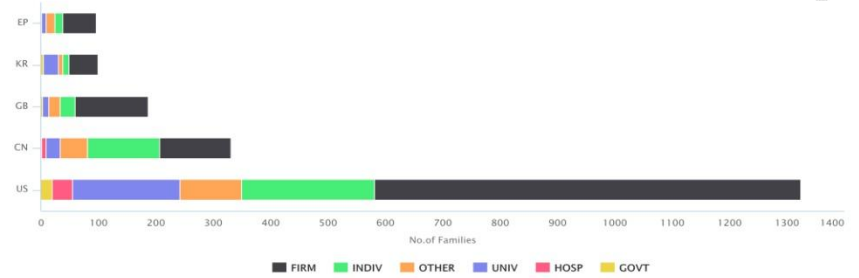



# Yaws

A

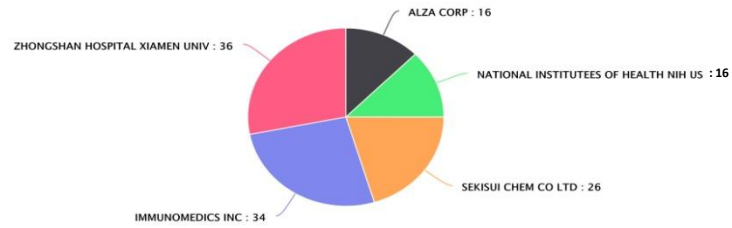

B

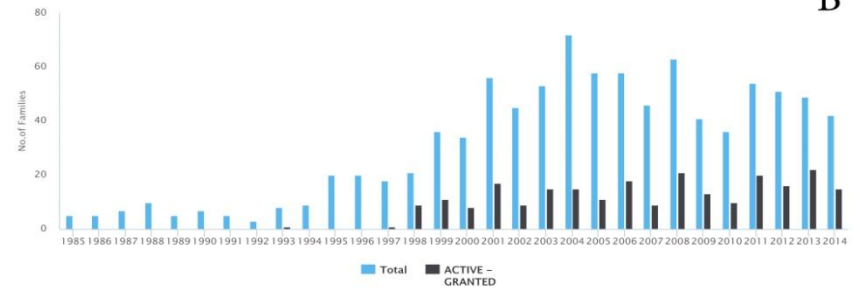

C

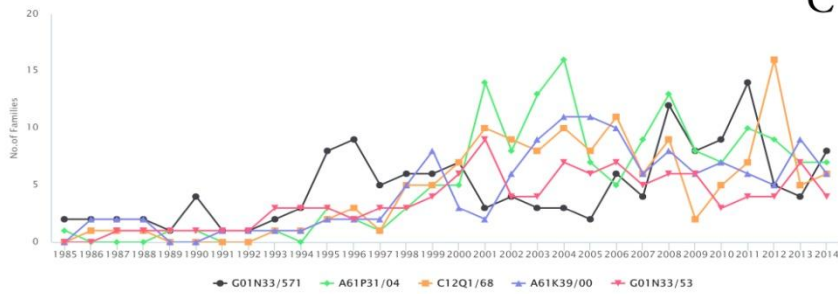

D

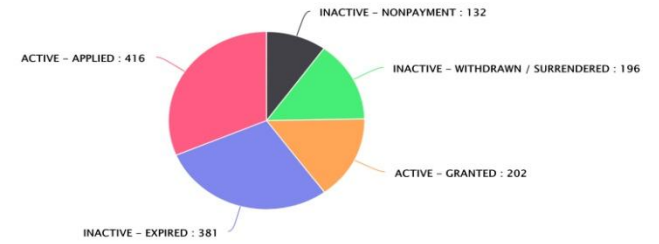

E

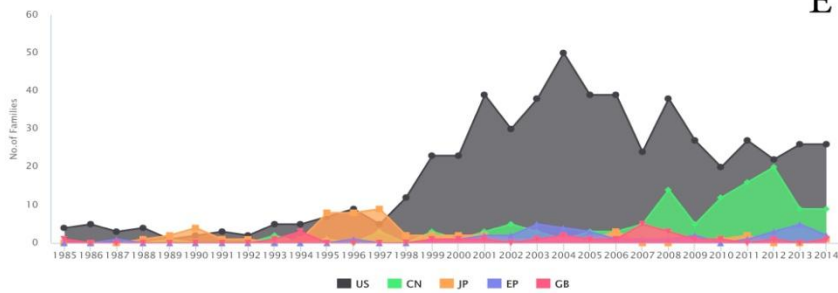

F

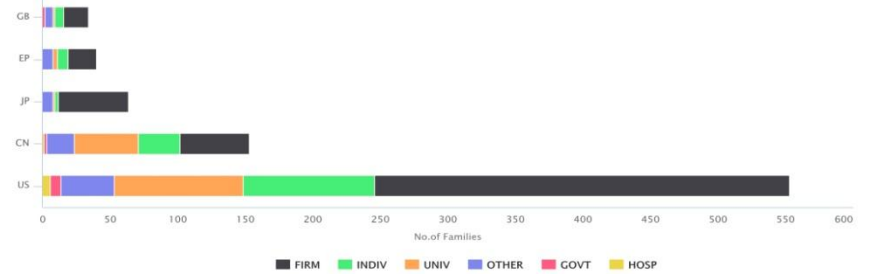

# Innovative and Intensified Disease Management vs. Preventive Chemotherapy and Transmission Control

G

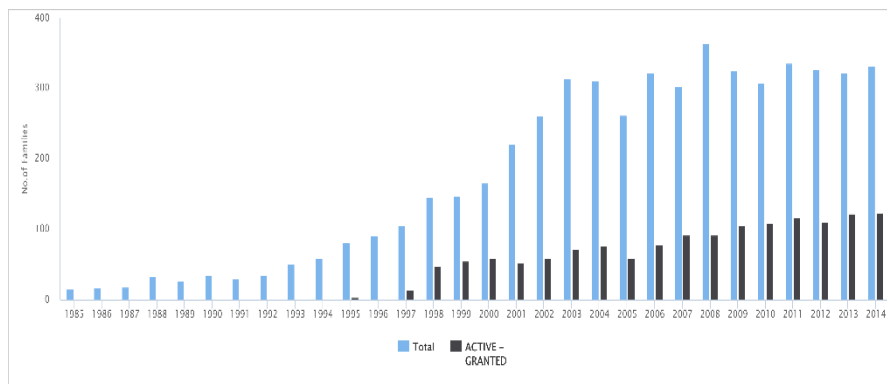

H

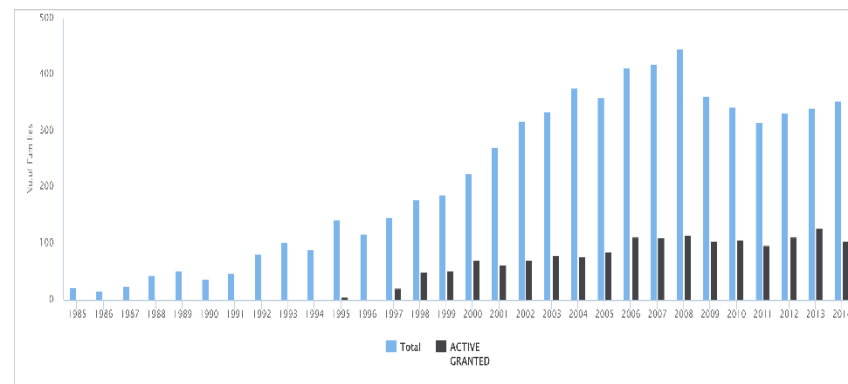

I

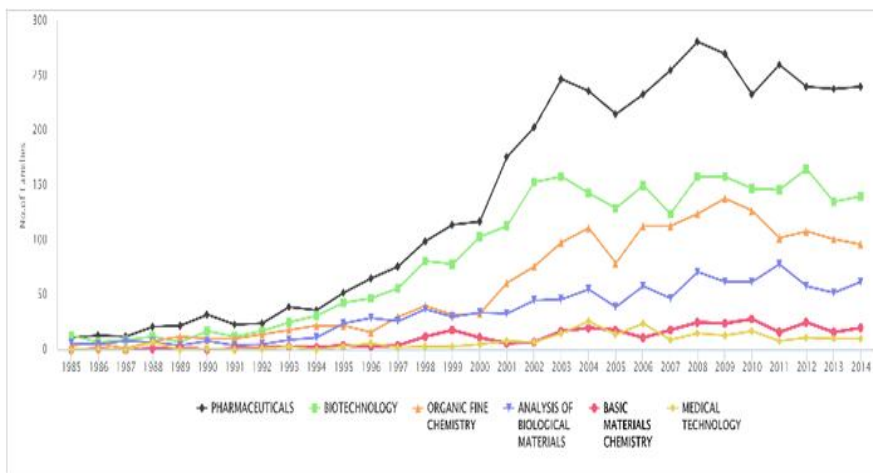

J

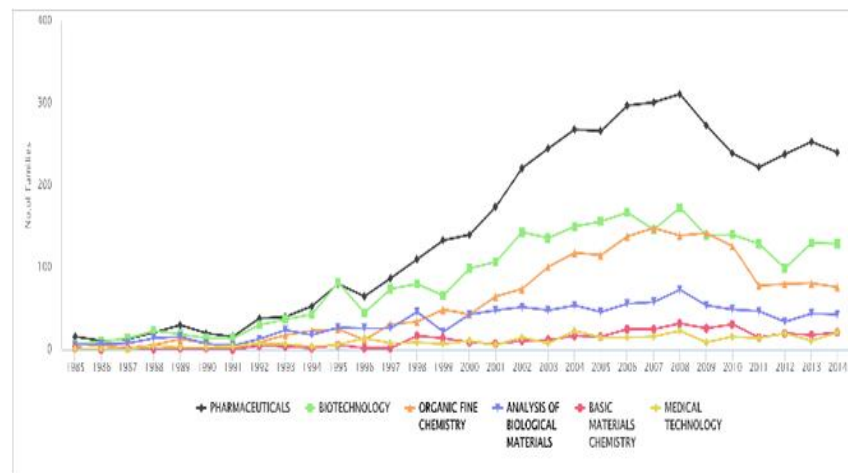

## Additional file 2

- A. Number of patent families for the top five assignees.
- B. Trend of total number of patent families and granted patent families by year.
- C. Number of patent families by top five International Patent Classification subgroups, by years.
- D. Current legal status of patents. Record numbers referring to the number of patent families.
- E. Number of patent families for the top five priority countries, by years.
- F. Number of patent families for the top five priority countries by types of assignee (unassigned patent families were not presented).
- G. Trend of total number of patent families and granted patent families by year for diseases of Innovative and Intensified Disease Management (Buruli ulcer, Chagas disease, Human African trypanosomiasis, Leishmaniasis, Yaws)
- H. Trend of total number of patent families and granted patent families by year for diseases of Preventive chemotherapy and transmission control (Dracunculiasis, Leprosy, Lymphatic filariasis, Onchocerciasis, Schistosomiasis, Soil-transmitted helminths, Trachoma)
- I. Technological fields of patent families over time for diseases of Innovative and Intensified Disease Management (Buruli ulcer, Chagas disease, Human African trypanosomiasis, Leishmaniasis, Yaws)
- J. Technological fields of patent families over time for diseases of Preventive chemotherapy and transmission control (Dracunculiasis, Leprosy, Lymphatic filariasis, Onchocerciasis, Schistosomiasis, Soil-transmitted helminths, Trachoma)

# Additional file 2

## **ABBREVIATIONS:**

firm (firms), indiv (individuals), univ (universities), inst (non-profit institutions), govt (governments) and hosp (hospitals) are assignee types for patents and patent applications.

AU (Australia), BR (Brazil), CN (China), DE (Denmark), EP (European Union-European Patent Office), FR (France), GB (Great Britain), IN (India), JP (Japan), KR (Korean), RU (Russia), SU (Soviet Union (USSR)), US (United States).
