# Supplementary material for: Patent landscape of neglected tropical diseases: an analysis of worldwide patent families
Source: Springer Nature journal article supplement (doi:10.1186/s12992-017-0306-9), 2017-11-14
Supplement: MOESM3 [file 15223934]

| <b>Disease</b>                | <b>DALY 2015</b> | <b>Patent families</b> | <b>Filed /DALY (%)</b> | <b>DALY/Filed</b> |
|-------------------------------|------------------|------------------------|------------------------|-------------------|
| Buruli ulcer                  | <b>0</b>         | <b>288</b>             | 0.000%                 | 0.000             |
| Chagas disease                | <b>236100</b>    | <b>1453</b>            | 0.615%                 | 162.491           |
| Dengue                        | <b>1892200</b>   | <b>2262</b>            | 0.120%                 | 836.516           |
| Dracunculiasis                | <b>0</b>         | <b>38</b>              | 0.000%                 | 0.000             |
| Echinococcosis                | <b>600000</b>    | <b>425</b>             | 0.071%                 | 1411.765          |
| Food-borne trematodiasis      | <b>168500</b>    | <b>255</b>             | 0.151%                 | 660.784           |
| Human African trypanosomiasis | <b>202400</b>    | <b>161</b>             | 0.080%                 | 1257.143          |
| Leishmaniasis                 | <b>1418900</b>   | <b>2294</b>            | 0.162%                 | 618.527           |
| Leprosy                       | <b>31000</b>     | <b>2003</b>            | 6.461%                 | 15.477            |
| Lymphatic filariasis          | <b>2075000</b>   | <b>215</b>             | 0.010%                 | 9651.163          |
| Onchocerciasis                | <b>1135700</b>   | <b>247</b>             | 0.022%                 | 4597.976          |
| Rabies                        | <b>931600</b>    | <b>2157</b>            | 0.232%                 | 431.896           |
| Schistosomiasis               | <b>2613300</b>   | <b>1486</b>            | 0.057%                 | 1758.614          |
| Soil transmitted helminthes   | <b>3378300</b>   | <b>478</b>             | 0.014%                 | 7067.573          |
| Taeniasis                     | <b>503000</b>    | <b>157</b>             | 0.031%                 | 3203.822          |
| Trachoma                      | <b>279200</b>    | <b>1874</b>            | 0.671%                 | 148.986           |
| Yaws                          | <b>0</b>         | <b>853</b>             | 0.000%                 | 0.000             |
| Cancer                        | <b>209359200</b> | <b>215149</b>          | 0.103%                 | 973.089           |
| Lung cancer                   | <b>36419500</b>  | <b>39007</b>           | 0.107%                 | 933.666           |
| Cardiovascular diseases       | <b>347528900</b> | <b>158915</b>          | 0.046%                 | 2186.885          |
| Malaria                       | <b>55769600</b>  | <b>6067</b>            | 0.011%                 | 9192.286          |
| HIV/AIDS                      | <b>66689500</b>  | <b>387811</b>          | 0.582%                 | 171.964           |
| all neglected                 | <b>15465200</b>  | <b>12694</b>           | 0.082%                 | 1218.308          |
| MIN                           |                  | <b>0</b>               |                        |                   |
| MAX                           |                  | <b>347528900</b>       |                        |                   |

DALYs=disability-adjusted life-years.

daly source: <https://www.ncbi.nlm.nih.gov/pmc/articles/PMC5388857/table/tb11/>

daly source <https://www.ncbi.nlm.nih.gov/pmc/articles/PMC4126350/table/T1/>

| <i>Norm DALY</i> | <b>All filed*Norm<br/>DALY</b> |
|------------------|--------------------------------|
| 0.00000          | 0.000                          |
| 0.00068          | 0.987                          |
| 0.00544          | 12.316                         |
| 0.00000          | 0.000                          |
| 0.00173          | 0.734                          |
| 0.00048          | 0.124                          |
| 0.00058          | 0.094                          |
| 0.00408          | 9.366                          |
| 0.00009          | 0.179                          |
| 0.00597          | 1.284                          |
| 0.00327          | 0.807                          |
| 0.00268          | 5.782                          |
| 0.00752          | 11.174                         |
| 0.00972          | 4.647                          |
| 0.00145          | 0.227                          |
| 0.00080          | 1.506                          |
| 0.00000          | 0.000                          |
| 0.60242          | 129610.581                     |
| 0.10480          | 4087.762                       |
| 1.00000          | 158915.000                     |
| 0.16047          | 973.600                        |
| 0.19190          | 74419.485                      |
| 0.04450          | 564.889                        |
